# Supplementary material for: Global microbial necromass contribution to soil organic matter
Source: Research Square preprint supplement (doi:10.21203/rs.3.rs-473688/v1), 2021-05-20
Supplement: Supplementary file 1 [file 427b4bcd9dcbca6d39e78007.docx]

**Supplementary data**: Global amino sugar datasets generated and compiled from 119 peer-reviewed studies and our own data.
